# Supplementary material
Source: publisher figshare collection journal article supplement (https://gsajournals.figshare.com/ndownloader/files/15368744)
Supplement: Supplementary file 1 [file 15368744]

## Sheet: Sheet1
Table S2: List of differentially regulated genes in Myc supercompetitors (p<0.05)
Flybase ID	Gene	Fold Change	Adjusted p-value
FBgn0031684	ND-13A	3.56727	2.51442e-09
FBgn0016694	Pdp1	3.00359	4.0996e-11
FBgn0031682	CG5828	3.00091	2.93112e-06
FBgn0013279	Hsp70Bc	2.9178	0.000122692
FBgn0031683	CG4230	2.80496	2.90191e-06
FBgn0250910	Octbeta3R	2.78252	4.03337e-06
FBgn0034579	mRpL54	2.75675	6.16516e-06
FBgn0052207	CR32207	2.48739	7.5884e-05
FBgn0262656	Myc	2.45767	2.78932e-09
FBgn0032405	CG14946	2.4171	1.27394e-05
FBgn0035805	CG7506	2.40437	0.000134564
FBgn0270926	AsnS	2.35474	0.000392816
FBgn0031629	Clect27	2.28458	0.0018794
FBgn0005278	Sam-S	2.22896	1.51872e-20
FBgn0083968	CG34132	2.18863	0.000614022
FBgn0035982	CG4461	2.15424	0.00430804
FBgn0034299	CG5757	2.15332	8.41474e-06
FBgn0036135	mRpL2	2.12587	0.000329226
FBgn0034879	Rrp4	2.08532	0.000640003
FBgn0052865	alphagamma-element:CR32865	2.05765	0.00484479
FBgn0267518	2SrRNA-Psi:CR45858	2.05641	0.0274564
FBgn0015245	Hsp60	2.04857	8.29556e-07
FBgn0010397	LamC	2.04808	2.54245e-05
FBgn0033741	CG8545	2.03831	7.41422e-05
FBgn0026409	Mpcp2	2.02719	1.03644e-09
FBgn0036754	CG5589	2.01521	0.00252551
FBgn0010222	Nmdmc	2.01401	8.41474e-06
FBgn0260795	NaPi-III	2.0074	1.32147e-06
FBgn0039972	CG17018	1.99803	0.0107954
FBgn0003360	sesB	1.99755	2.08393e-09
FBgn0038925	Cchl	1.9894	0.000454415
FBgn0035415	CG14966	1.98923	0.00740823
FBgn0027259	Kmn1	1.93851	0.0439507
FBgn0262559	Mdh2	1.92723	3.9784e-05
FBgn0036030	CG6767	1.92512	5.04283e-08
FBgn0034259	P32	1.91403	1.60664e-05
FBgn0003257	r-l	1.91331	0.000336223
FBgn0027619	Adam	1.90481	0.00171316
FBgn0036502	CG7841	1.89612	0.00467785
FBgn0003978	vls	1.89557	0.000918438
FBgn0021906	RFeSP	1.89517	2.81365e-05
FBgn0030629	CG9123	1.87959	0.00339858
FBgn0014455	Ahcy13	1.87523	9.37659e-05
FBgn0259937	Nop60B	1.86324	1.10671e-07
FBgn0036007	path	1.86122	2.93691e-07
FBgn0039828	CG1542	1.85849	2.84826e-05
FBgn0038922	CG6439	1.85778	2.81365e-05
FBgn0024920	Ts	1.85561	0.00833574
FBgn0035510	Cpr64Aa	1.84714	0.00375985
FBgn0038326	CG5044	1.84473	0.00938664
FBgn0027580	PCB	1.83128	2.54245e-05
FBgn0032408	CG6712	1.83057	0.000147774
FBgn0031247	CG11562	1.82956	0.0233119
FBgn0000566	Eip55E	1.82499	6.76587e-05
FBgn0036764	CG5535	1.82455	0.00251632
FBgn0002778	mnd	1.81719	0.000432433
FBgn0027080	Aats-tyr	1.81285	0.000217094
FBgn0030630	CG12608	1.81103	0.000920969
FBgn0062928	pncr009:3L	1.81062	0.0387397
FBgn0002780	mod	1.80469	7.02257e-09
FBgn0033918	CG8531	1.80343	0.000881176
FBgn0032189	Ripalpha	1.80241	0.0205642
FBgn0267516	pre-rRNA-Psi:CR45856	1.80075	0.00077347
FBgn0036369	CG10089	1.79786	0.0295566
FBgn0032151	nAChRalpha6	1.79081	0.000640003
FBgn0030061	CG1785	1.78855	0.000336223
FBgn0039241	CG11089	1.78363	2.59351e-05
FBgn0019936	RpS20	1.78282	0.000432433
FBgn0013269	FK506-bp1	1.78245	0.000160238
FBgn0003885	alphaTub84D	1.78073	5.96671e-05
FBgn0052278	CG32278	1.78015	0.0220253
FBgn0035600	Cyt-c1	1.77154	0.000855384
FBgn0035901	CG6745	1.77066	0.00828882
FBgn0011206	bol	1.77048	0.0152717
FBgn0039358	CG5028	1.76497	3.20427e-06
FBgn0261955	kdn	1.76459	1.07199e-05
FBgn0039274	CG11920	1.75712	0.00662449
FBgn0004363	porin	1.75047	3.20732e-06
FBgn0037135	CG7414	1.74305	9.79801e-07
FBgn0024183	vig	1.73894	0.000854122
FBgn0037328	RpL35A	1.73591	4.33707e-06
FBgn0030853	ND-24	1.73509	0.00357651
FBgn0027291	l(1)G0156	1.73345	2.81365e-05
FBgn0016119	ATPsynCF6	1.73345	0.0031816
FBgn0046214	vig2	1.73098	2.81365e-05
FBgn0036825	RpL26	1.72771	1.44595e-05
FBgn0034354	GstE11	1.72014	0.00740823
FBgn0020618	Rack1	1.71801	2.54245e-05
FBgn0004404	RpS14b	1.71299	0.00478555
FBgn0024558	Dph5	1.7125	0.0180301
FBgn0086384	Mer	1.71142	0.00321023
FBgn0003279	RpL4	1.71037	2.92374e-05
FBgn0030504	CG2691	1.70936	6.45156e-06
FBgn0033661	CG13185	1.70728	2.81365e-05
FBgn0051759	CG31759	1.70625	0.00740823
FBgn0021967	ND-PDSW	1.70625	0.0192643
FBgn0026566	CG1307	1.70496	0.00077347
FBgn0021874	Nle	1.70477	0.00258658
FBgn0011284	RpS4	1.70207	0.000269444
FBgn0036812	Nufip	1.70185	0.0160287
FBgn0015521	RpS21	1.69995	0.00268941
FBgn0264816	koko	1.69982	0.000492419
FBgn0004556	Dbp73D	1.69953	0.0477434
FBgn0022344	CG10340	1.69806	0.000336223
FBgn0033457	Ntmt	1.69691	0.0417662
FBgn0037722	CG8319	1.69687	0.0141849
FBgn0015756	RpL9	1.69558	7.59729e-07
FBgn0026372	RpL23A	1.69435	7.5884e-05
FBgn0031148	Cbs	1.6934	3.54867e-05
FBgn0033555	RpS15Ab	1.69276	0.00406381
FBgn0284248	Cyt-c-p	1.69272	0.00478511
FBgn0028737	Ef1beta	1.68925	3.89183e-05
FBgn0040251	Ugt86Di	1.68864	0.00874303
FBgn0038467	AdSL	1.68706	0.00122495
FBgn0014026	RpL7A	1.68647	0.00472032
FBgn0262511	Vha44	1.6858	0.000329226
FBgn0263605	l(3)72Dn	1.68559	0.0346575
FBgn0029133	REG	1.68211	8.32417e-06
FBgn0035160	hng3	1.68177	0.016338
FBgn0267514	5.8SrRNA-Psi:CR45854	1.68057	0.0354729
FBgn0027493	AdSS	1.68001	0.000330856
FBgn0032154	mtDNA-helicase	1.67603	0.0133855
FBgn0029176	Ef1gamma	1.67518	1.13958e-06
FBgn0261609	eIF-2alpha	1.67224	7.20397e-06
FBgn0036537	CG18081	1.67223	0.00252551
FBgn0023076	Clk	1.66999	0.0143492
FBgn0044510	mRpS5	1.66982	0.0418017
FBgn0033351	CG8235	1.66525	0.0160287
FBgn0011455	ND-SGDH	1.66319	0.0160287
FBgn0004652	fru	1.66253	0.0206867
FBgn0031265	CG2794	1.66245	0.0151762
FBgn0035639	CG5537	1.66147	0.0011313
FBgn0086472	RpS25	1.65763	0.000107346
FBgn0002593	RpLP1	1.6576	0.000103462
FBgn0035063	CG3594	1.65671	0.000432433
FBgn0039857	RpL6	1.65616	6.45156e-06
FBgn0034968	RpL12	1.6547	0.000660925
FBgn0027087	Aats-his	1.65352	0.0130429
FBgn0028426	JhI-1	1.65013	0.00472032
FBgn0034914	CG5554	1.64938	0.00552593
FBgn0017579	RpL14	1.64566	0.000269444
FBgn0036538	CG15715	1.6386	0.0425141
FBgn0284245	Ef1alpha48D	1.63858	7.02257e-09
FBgn0002590	RpS5a	1.63697	2.93383e-07
FBgn0037728	CG16817	1.63639	0.00718663
FBgn0036199	Bmcp	1.6356	0.0294415
FBgn0037686	RpL34b	1.63404	0.00196033
FBgn0005593	RpL7	1.63139	0.000329226
FBgn0039830	ATPsynC	1.62955	0.00472032
FBgn0020255	Ran	1.62847	7.41422e-05
FBgn0031660	mRpL28	1.62751	0.0195521
FBgn0033169	CG11123	1.62674	0.0028288
FBgn0003141	pr	1.62455	0.0116557
FBgn0015834	Trip1	1.6235	0.00740823
FBgn0026250	eIF-1A	1.62201	0.000160238
FBgn0035524	CG11583	1.62148	0.0112714
FBgn0261597	RpS26	1.61959	0.000305664
FBgn0036334	CG11267	1.61904	0.0481485
FBgn0042083	CG3267	1.61858	0.00557983
FBgn0263143	vret	1.61763	0.0111805
FBgn0011211	blw	1.61636	1.3202e-05
FBgn0000147	aurA	1.61541	0.0160287
FBgn0037051	CG10565	1.61474	0.00375714
FBgn0036928	Tom20	1.61242	0.0188523
FBgn0020235	ATPsyngamma	1.61227	0.0210649
FBgn0040078	pont	1.61108	0.0222686
FBgn0030501	BthD	1.60679	0.0011288
FBgn0034176	ste24a	1.60673	0.00375714
FBgn0037566	mRpL1	1.60585	0.0210126
FBgn0033699	RpS11	1.60571	7.2395e-05
FBgn0039735	Nph	1.60351	0.0202135
FBgn0265192	Snp	1.6033	0.00990383
FBgn0028342	ATPsyndelta	1.60172	0.000715402
FBgn0001125	Got2	1.60131	0.00245893
FBgn0086687	Desat1	1.59687	0.00787984
FBgn0260858	Ykt6	1.5968	0.00828882
FBgn0085765	2SrRNA-Psi:CR40677	1.59636	0.0426543
FBgn0033879	CG6543	1.59538	0.000991038
FBgn0038961	CG13850	1.59421	0.0434243
FBgn0285950	RpL19	1.59395	2.99767e-06
FBgn0015288	RpL22	1.59332	0.000612153
FBgn0260456	CG4806	1.59242	0.0417662
FBgn0243511	psidin	1.59239	0.00485131
FBgn0010247	Parp	1.59226	0.00542254
FBgn0038964	Nop56	1.59194	0.000432433
FBgn0011272	RpL13	1.59089	2.81365e-05
FBgn0030136	RpS28b	1.59087	0.00146635
FBgn0286051	CG8368	1.58987	0.0337519
FBgn0002622	RpS3	1.58852	8.69101e-05
FBgn0011361	ND-ACP	1.58851	0.00319436
FBgn0032138	CG4364	1.58466	0.000459315
FBgn0266570	CG2982	1.58268	0.0346575
FBgn0026576	CG5991	1.58219	0.0477434
FBgn0031678	CG31918	1.581	0.0130429
FBgn0003062	Fib	1.5792	0.0173393
FBgn0016120	ATPsynD	1.57773	0.00874303
FBgn0032919	CG9253	1.57621	0.00190836
FBgn0032987	RpL21	1.57384	0.00190494
FBgn0004867	RpS2	1.57302	0.00141839
FBgn0024733	RpL10	1.57112	0.000119313
FBgn0037351	RpL13A	1.57034	0.0264594
FBgn0038271	UQCR-C1	1.56946	0.00391709
FBgn0036257	RhoGAP68F	1.56822	0.00426119
FBgn0016726	RpL29	1.56557	0.0120211
FBgn0034743	RpS16	1.56465	0.00034194
FBgn0023542	Nmd3	1.5614	0.00512082
FBgn0283427	FASN1	1.56012	0.00718887
FBgn0035422	RpL28	1.55957	0.00915243
FBgn0284256	bsf	1.5571	0.00544619
FBgn0086710	RpL30	1.55683	0.0130927
FBgn0036096	CG8003	1.55606	0.00623099
FBgn0030151	CG1354	1.55556	0.000202247
FBgn0261592	RpS6	1.5538	0.000585111
FBgn0031895	CG4497	1.55296	0.0446344
FBgn0039929	CG11076	1.55282	0.0319013
FBgn0011638	La	1.55182	0.00097864
FBgn0022029	l(2)k01209	1.55052	0.000827392
FBgn0028473	Non1	1.55024	8.31021e-05
FBgn0261608	RpL37A	1.54905	0.00542254
FBgn0036213	RpL10Ab	1.54678	0.000344159
FBgn0036702	CG6512	1.54234	0.0351673
FBgn0000181	bic	1.54016	0.000483276
FBgn0083123	Uhg5	1.53921	0.048763
FBgn0032101	CG9586	1.53472	0.0362653
FBgn0040309	Jafrac1	1.53375	0.0417662
FBgn0011586	e(r)	1.53076	0.0125217
FBgn0284253	CG33123	1.52736	0.000159285
FBgn0003517	sta	1.52637	0.000684376
FBgn0037810	sle	1.52625	0.00740823
FBgn0266452	CTPsyn	1.52553	0.00484479
FBgn0039757	RpS7	1.52542	0.00252551
FBgn0035630	CG10576	1.52539	0.00106126
FBgn0037504	CG1142	1.52535	0.0382637
FBgn0033540	Elp2	1.5248	0.00304736
FBgn0286828	CG7705	1.52437	0.00394515
FBgn0263490	mld	1.52371	0.00271698
FBgn0283478	und	1.52327	0.00938664
FBgn0086706	pix	1.52271	0.000135409
FBgn0022288	l(2)09851	1.52088	0.0279297
FBgn0010198	RpS15Aa	1.51951	0.000706477
FBgn0035753	RpL18	1.51942	0.0182509
FBgn0010551	Phb2	1.51738	0.0202943
FBgn0031980	RpL36A	1.516	0.0129236
FBgn0037899	RpL24-like	1.51591	0.00911616
FBgn0002626	RpL32	1.51556	0.00943786
FBgn0011204	cue	1.51502	0.0247497
FBgn0020392	Nmt	1.51462	0.0157055
FBgn0035896	CG6983	1.51424	0.0128345
FBgn0283535	Vha26	1.51152	0.000319244
FBgn0001341	l(1)1Bi	1.50923	0.0316557
FBgn0026252	msk	1.50712	0.000250963
FBgn0037270	CG9769	1.50711	0.0392346
FBgn0036668	CG9715	1.50683	0.00180421
FBgn0266599	Hsc70-4	1.50443	0.000982882
FBgn0038269	Rrp6	1.50238	0.0118661
FBgn0267524	2SrRNA:CR45864	1.50234	0.0310039
FBgn0285952	eIF-5A	1.50191	3.20732e-06
FBgn0010197	Gyc32E	0.663216	0.0434243
FBgn0267336	Glut4EF	0.662178	0.0100803
FBgn0000482	dor	0.660884	0.0257677
FBgn0261563	wb	0.657048	0.00375714
FBgn0045761	CHKov1	0.656611	0.03207
FBgn0029679	CG2901	0.648892	0.034179
FBgn0243486	rdo	0.647293	0.0343191
FBgn0263109	CG43366	0.645621	0.0133111
FBgn0033438	Mmp2	0.644316	0.0011313
FBgn0029082	hbs	0.638687	0.0150157
FBgn0023531	CG32809	0.638505	0.0277875
FBgn0268063	ltl	0.634257	0.0125217
FBgn0032666	CG5758	0.632225	0.0136444
FBgn0033405	CG13954	0.629955	0.0343191
FBgn0261529	ms(2)34Fe	0.628764	0.0155681
FBgn0038788	Sirt2	0.625599	0.0379492
FBgn0015774	NetB	0.624165	0.0257651
FBgn0032535	Ance-2	0.623534	0.0486273
FBgn0040321	GNBP3	0.621876	0.0125938
FBgn0283451	CG11509	0.618073	0.000901529
FBgn0003090	pk	0.617684	0.00104783
FBgn0051075	CG31075	0.617405	0.0100803
FBgn0263764	CR43681	0.617345	0.0417601
FBgn0026602	Ady43A	0.613621	0.0165199
FBgn0032016	CG7818	0.612593	0.0177896
FBgn0020376	Sr-CIII	0.611379	0.00740823
FBgn0263037	CG43332	0.607434	0.0486273
FBgn0029834	CG5937	0.596292	0.046048
FBgn0045479	Gr64a	0.595965	0.0212918
FBgn0050158	CG30158	0.591008	0.048763
FBgn0034978	CG3257	0.590812	0.0347276
FBgn0028369	kirre	0.590803	0.0143492
FBgn0041623	Or65c	0.590689	0.00594152
FBgn0283476	Dhc16F	0.586942	0.0178819
FBgn0001269	inv	0.586564	0.00153699
FBgn0286203	laccase2	0.586483	3.88433e-05
FBgn0015038	Cyp9b1	0.584859	0.0188006
FBgn0031935	CG13793	0.580609	0.0316557
FBgn0034860	CG9812	0.580485	0.0155179
FBgn0027611	LManII	0.577795	0.0011313
FBgn0034462	CG15905	0.572481	0.00271698
FBgn0052450	CG32450	0.572402	0.0093393
FBgn0036716	CG13728	0.569414	0.0157055
FBgn0052255	Gr64f	0.56805	0.0296703
FBgn0035756	unc-13-4A	0.562974	0.0161992
FBgn0016036	mei-P22	0.562943	0.0434243
FBgn0052547	CG32547	0.56131	0.0397097
FBgn0033875	CG6357	0.553253	0.00117226
FBgn0033980	Cyp6a20	0.55009	0.00803219
FBgn0024293	Spn43Ab	0.548925	0.0099107
FBgn0003079	phl	0.541285	0.000280288
FBgn0032004	CG8292	0.540187	0.00943674
FBgn0035880	CG17352	0.538956	0.00375714
FBgn0050362	boly	0.533751	0.0477434
FBgn0031573	CG3407	0.530991	0.00548212
FBgn0265636	CR44443	0.524055	0.0160287
FBgn0021742	C901	0.510393	0.000425741
FBgn0086367	t	0.510216	0.00120792
FBgn0250833	CG34461	0.510057	0.0160287
FBgn0020377	Sr-CII	0.50923	0.0157055
FBgn0000449	dib	0.504946	0.0197815
FBgn0267925	CR46206	0.501135	0.0203136
FBgn0015039	Cyp9b2	0.487076	0.00083713
FBgn0053099	CG33099	0.479436	0.00130774
FBgn0040801	CG13053	0.464297	0.00828882
FBgn0002629	E(spl)m4-BFM	0.458512	0.000991038
FBgn0039585	CG1894	0.429726	0.00245893
FBgn0024294	Spn43Aa	0.425742	2.38665e-06
FBgn0087011	CG41520	0.325469	2.1118e-11
FBgn0263780	CG17684	0.277146	2.51442e-09
FBgn0260746	Ect3	0.253806	2.7e-14
